# The American Journal of Psychiatry

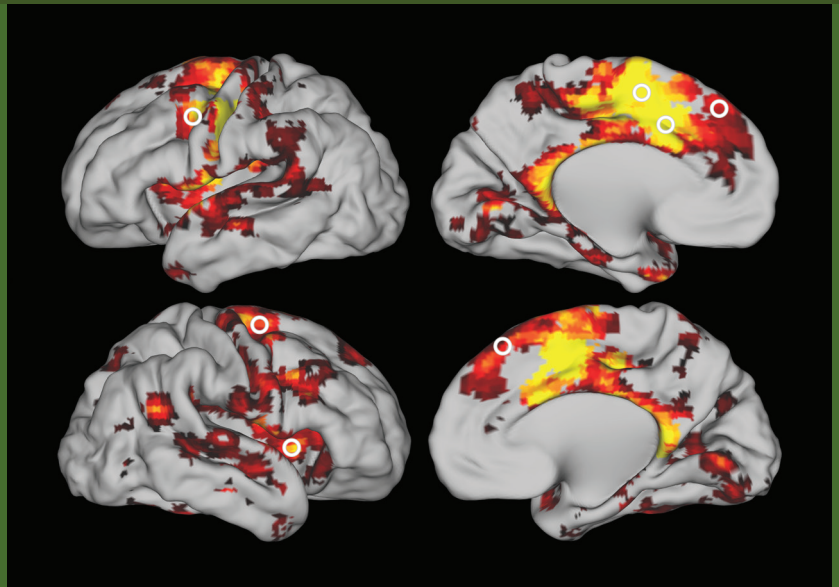

Understanding the Value and Limitations of MRI  
Neuroimaging in Psychiatry

A Biased Perspective on Brain Imaging of ADHD

Disrupted Dorsal Mid-Insula Activation During  
Interoception Across Psychiatric Disorders

Neonatal Brain Response to Deviant Auditory Stimuli  
and Relation to Maternal Trait Anxiety

AMERICAN  
PSYCHIATRIC  
ASSOCIATION

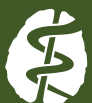

[ajp.psychiatryonline.org](http://ajp.psychiatryonline.org)
