# Subscription and Business Information

*The American Journal of Psychiatry*, ISSN 0002-953X, is published monthly by the American Psychiatric Association.

The American Psychiatric Association does not hold itself responsible for statements made in its publications by contributors or advertisers. Unless so stated, material in *The American Journal of Psychiatry* does not reflect the endorsement, official attitude, or position of the American Psychiatric Association or of the Journal's Editorial Board.

Periodicals postage paid at Washington, DC, and additional mailing offices. POSTMASTER: Send address changes to *The American Journal of Psychiatry*, Circulation Department, American Psychiatric Association, 800 Maine Avenue, S.W., Suite 900, Washington, D.C. 20024.

## Editorial Office

*American Journal of Psychiatry*  
American Psychiatric Association  
800 Maine Avenue, S.W., Suite 900  
Washington, D.C. 20024  
E-mail: [ajp@psych.org](mailto:ajp@psych.org)

## Customer Service

Phone: (800) 368-5777 (toll-free)  
E-mail: [appi@psych.org](mailto:appi@psych.org)

## APA Member Subscription Services

Phone: (888) 35-PSYCH (toll-free)

## Subscriptions

Regular and resident-fellow members in the U.S. receive print and online access as a **member benefit**. Subscriptions for non-members start at \$362 per year. Online only subscriptions start at \$327 per year. Go to <http://www.appi.org/products> for more information.

Institutional subscriptions are tier priced. For institutional site license or pricing information, contact (202) 559-3729 or [institutions@psych.org](mailto:institutions@psych.org).

*Additional subscription options, including single issues and student rates*  
Contact Customer Service

## Advertising

*Pharmaceutical Print and Online Advertising*  
Frank Cox, Kathleen Harrison, Tim Wolfinger  
Pharmaceutical Media, Inc.  
30 East 33rd Street  
New York, NY 10016  
Phone: (212) 904-0379  
E-mail: [twolfinger@pminy.com](mailto:twolfinger@pminy.com)

*Nonpharmaceutical and Online Sales*  
Eamon Wood  
Pharmaceutical Media, Inc.  
E-mail: [ewood@pminy.com](mailto:ewood@pminy.com)  
(see address and phone above).

## Permissions and Reprints

Material published in the journals of the American Psychiatric Association and American Psychiatric Association Publishing is protected by copyright and all rights are reserved. Material may not be reproduced in any form or by any means without written permission from the copyright owner. For permission to reproduce material published by APA, please visit <http://www.appi.org/customer-service/permissions> for more information. Permission can also be secured through the Copyright Clearance Center ([www.copyright.com](http://www.copyright.com)).

APA does not require that permission be obtained for the photocopying of isolated articles for nonprofit classroom or library reserve use; all fees associated with such permission are waived. This consent does not extend to other kinds of copying, such as copying for general distribution, for advertising or promotional purposes, for creating new collective works, or for resale. Requests for commercial distribution and bulk reprints should be directed to (202) 609-7075.

Indexed in Abstracts for Social Workers, Academic Abstracts, Biological Abstracts, Chemical Abstracts, Chicago Psychoanalytic Literature Index, Cumulative Index to Nursing Literature, Excerpta Medica, Hospital Literature Index, Index Medicus, International Nursing Index, Nutrition Abstracts, Psychological Abstracts, Science Citation Index, Social Science Source, and Social Sciences Index.

Pages are produced by KnowledgeWorks Global (Waterbury, VT) and printed by Sheridan NH (Hanover, NH) on acid-free paper effective with Volume 169, Number 1, January 2012.

© 2021 American Psychiatric Association.

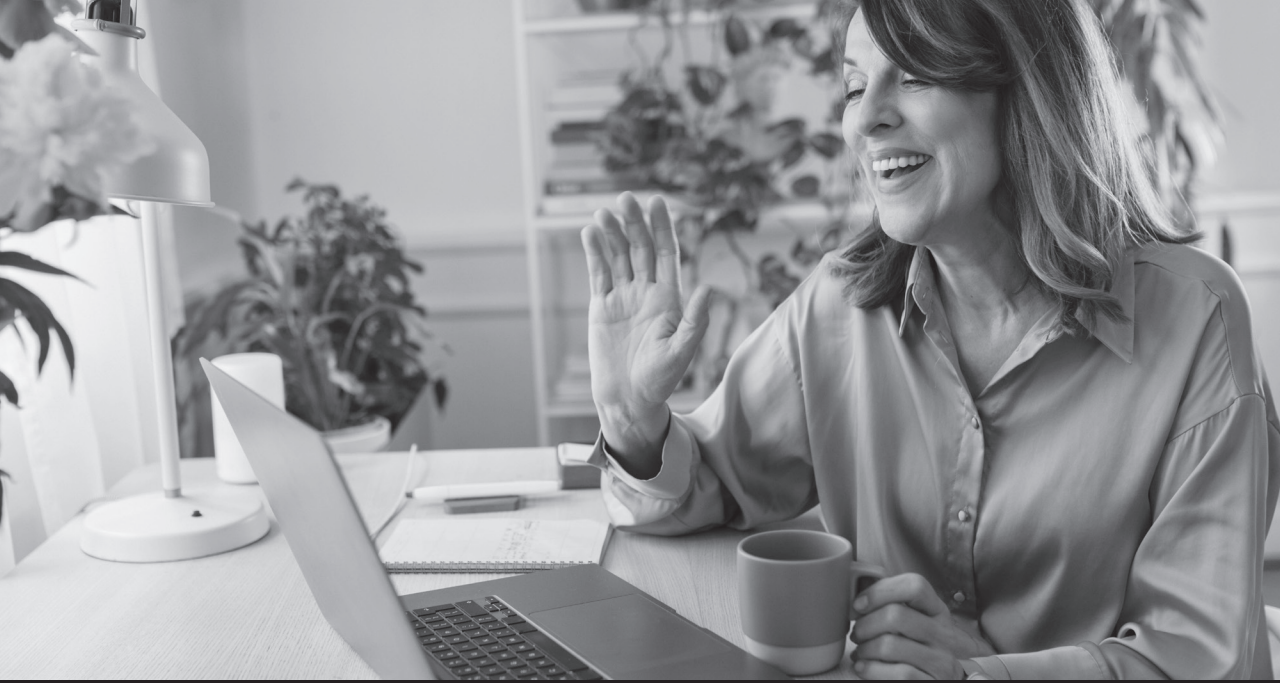

# We've Got You Covered

## American Psychiatric Association Endorsed Professional Liability Insurance Program

Designed for Psychiatrists in all practice settings

**DID YOU KNOW? We find that our policyholders are more likely to receive a board complaint than be named in a claim or lawsuit.**

Most insurance policies provided by employers do not include reimbursement for costs incurred to defend a complaint (or have limits that may be shared with others).

Not to worry... we include up to \$50,000 of defense reimbursement – with the option to increase this limit to \$150,000.

What's more, coverage for **Telepsychiatry** is provided, subject to the terms and conditions of the policy.

Cyber Coverage is available as an endorsement at renewal or on a new American Professional Agency policy. Available in most states on an admitted basis.

*(All discounts, coverage features and rating are subject to individual state approval.)*

Visit us at [apamalpractice.com](http://apamalpractice.com) or call **877-740-1777** to learn more.

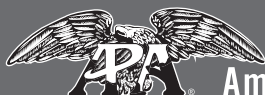

**American Professional Agency**

LEADERS IN PSYCHIATRIC MEDICAL LIABILITY INSURANCE

AMERICAN  
PSYCHIATRIC  
ASSOCIATION

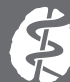

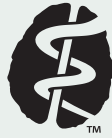

# The American Journal of Psychiatry

Official Journal of the American Psychiatric Association

## Officers 2021–2022

### President

Vivian B. Pender, M.D.

### President-Elect

Rebecca W. Brendel, M.D., J.D.

### Treasurer

Richard F. Summers, M.D.

### Secretary

Sandra M. DeJong, M.D., M.Sc.

### Assembly

#### Speaker

Mary Jo Fitz-Gerald, M.D, M.B.A.

#### Speaker-Elect

Adam Nelson, M.D.

#### Recorder

Vasilis K. Pozios, M.D.

### Office of the CEO and Medical Director

#### CEO and Medical Director

Saul Levin, M.D., M.P.A., F.R.C.P.-E.

### Board of Trustees

Elie G. Aoun, M.D., M.R.O.

Jenny L. Boyer, M.D., Ph.D., J.D.

Kenneth Certa, M.D.

Jeffrey L. Geller, M.D., M.P.H.

Glenn A. Martin, M.D.

Eric M. Plakun, M.D.

Michele Reid, M.D.

Mary Hasbah Roessel, M.D.

Bruce J. Schwartz, M.D.

Altha J. Stewart, M.D.

Felix Torres, M.D., M.B.A.

Sanya Virani, M.D., M.P.H.

Cheryl D. Wills, M.D.

Urooj Yazdani, M.D.

Melinda Young, M.D.

## Editorial Board

### Editor-in-Chief

Ned H. Kalin, M.D.

### Deputy Editors

Elisabeth Binder, M.D., Ph.D.

Kathleen T. Brady, M.D., Ph.D.

David A. Lewis, M.D.

Daniel S. Pine, M.D.

Carolyn Rodriguez, M.D., Ph.D.

Madhukar Trivedi, M.D.

### Associate Editors

Olusola Ajilore, M.D., Ph.D.

Huda Akil, Ph.D.

Melissa Arbuckle, M.D., Ph.D.

Eraka P.J. Bath, M.D.

Alan Brown, M.D., M.P.H.

Tyrone Cannon, Ph.D.

Karl Deisseroth, M.D., Ph.D.

Benjamin G. Druss, M.D., M.P.H.

Javier I. Escobar, M.D., M.Sc.

Julie L. Fudge, M.D.

Qiyong Gong, M.D., Ph.D.

Raquel E. Gur, M.D., Ph.D.

Helena Hansen, M.D., Ph.D.

David C. Henderson, M.D.

Yasmin Hurd, Ph.D.

Clinton D. Kilts, Ph.D.

Carlos López Jaramillo, M.D., M.Sc., Ph.D.

Joan L. Luby, M.D.

John C. Markowitz, M.D.

Helen S. Mayberg, M.D., F.R.C.P.C.

Terrie E. Moffitt, Ph.D.

Charles B. Nemeroff, M.D., Ph.D.

Roy Perlis, M.D.

Diego A. Pizzagalli, Ph.D.

Bryan L. Roth, M.D., Ph.D.

Alan F. Schatzberg, M.D.

Dikoma C. Shungu, Ph.D.

Anita Thapar, M.B.B.Ch., F.R.C.Psych.,  
Ph.D., F.Med.Sci.

Mauricio Tohen, M.D., Dr.PH., M.B.A.

Giulio Tononi, M.D., Ph.D.

Nim Tottenham, Ph.D.

John T. Walkup, M.D.

### Editors Emeriti

Nancy C. Andreasen, M.D., Ph.D.

Robert Freedman, M.D.

### Former Editors

Amariah Brigham, M.D., 1844–1849

T. Romeyn Beck, M.D., 1849–1854

John P. Gray, M.D., 1854–1886

G. Alder Blumer, M.D., 1886–1894

Richard Dewey, M.D., 1894–1897

Henry M. Hurd, M.D., 1897–1904

Edward N. Brush, M.D., 1904–1931

Clarence B. Farrar, M.D., 1931–1965

Francis J. Braceland, M.D., 1965–1978

John C. Nemiah, M.D., 1978–1993

### Editorial Staff

#### Executive Editor

Michael D. Roy

#### Senior Editor

John J. Guardiano, Ph.D.

#### Production Manager

Susan Westrate

#### Staff Editor

Angela Moore

#### Editorial Support Services Manager

Heidi Koch-Bubel

#### Editorial Assistant

Linda LaCour

#### Editorial Assistant/ Permissions Coordinator

Megan Conley

#### Publisher

John McDuffie

## PERSPECTIVES

### EDITOR'S NOTE

#### 673 Understanding the Value and Limitations of MRI Neuroimaging in Psychiatry

*Ned H. Kalin, M.D.*

### EDITORIALS

#### 677 Setting the Foundations of Developmental Precision Psychiatry for ADHD

*Samuele Cortese, M.D., Ph.D.*

#### 680 Let's Be Clear That "Autism Spectrum Disorder Symptoms" Are Not Always Related to Autism Spectrum Disorder

*Catherine Lord, Ph.D., Somer L. Bishop, Ph.D.*

#### 683 When You Don't Feel Right Inside: Homeostatic Dysregulation and the Mid-Insular Cortex in Psychiatric Disorders

*Martin P. Paulus, M.D., Sahib S. Khalsa, M.D., Ph.D.*

### APA PRESIDENTIAL ADDRESSES

#### 686 2021 Annual Meeting: Presidential Address

*Jeffrey L. Geller, M.D., M.P.H.*

#### 689 2021 Annual Meeting: President-Elect Address

*Vivian Pender, M.D.*

#### 692 2021 Annual Meeting: CEO and Medical Director Address

*Saul Levin, M.D., M.P.A.*

### REVIEWS AND OVERVIEWS

#### 694 A Biased Perspective on Brain Imaging of ADHD

*Francisco Xavier Castellanos, M.D.*

This overview on MRI findings in ADHD emphasizes the importance of large-scale imaging/phenotyping studies, the within-subject reliability of structural MRI, and the transdiagnostic nature of many of the ADHD-related imaging findings.

#### 701 Evolution, Emotion, and Episodic Engagement

*Daniel S. Pine, M.D., et al.*

Data on emotion, evolution, and various forms of memory are integrated to propose a framework for psychopathology research that takes into account the notable differences in the brains of rodents, nonhuman primates, and humans.

#### 715 Evaluating the Machine Learning Literature: A Primer and User's Guide for Psychiatrists

*Adrienne Grzenda, M.D., Ph.D., et al.* [CME](#)

Machine learning holds promise for offering meaningful insights and applications in psychiatry through harnessing big data. An introduction into the fundamentals of machine learning provides the means to critically evaluate the emerging literature.

## ARTICLES

**730 Whole Brain White Matter Tract Deviation and Idiosyncrasy From Normative Development in Autism and ADHD and Unaffected Siblings Link With Dimensions of Psychopathology and Cognition**

*Yu-Hung Tung, M.D., et al.*

Autism spectrum disorder and ADHD could be conceptualized as white matter tract deviations and idiosyncratic change from normative patterns. The common brain-cognitive relationships underlying these neurodevelopmental disorders constitute a continuum from subtle to strong phenotypic expressions.

**744 A Longitudinal Study of Resting-State Connectivity and Response to Psychostimulant Treatment in ADHD**

*Luke J. Norman, Ph.D., et al.* EDITORIAL • CME

Brain imaging research suggests that studies of resting-state functioning connectivity might inform understandings of treatment for ADHD. New data from more than 200 individuals, with more than 100 with ADHD, scanned as many as five times throughout development suggest that the relationship between treatment response and brain function evolves with time.

**752 Variable Emergence of Autism Spectrum Disorder Symptoms From Childhood to Early Adulthood**

*Lucy Riglin, Ph.D., et al.* EDITORIAL • CME

Autism spectrum disorders are understood to be conditions that arise in early childhood. However, symptoms of these disorders can manifest in many ways, including at levels insufficiently severe to qualify for a full diagnosis. New data on changes in autism spectrum disorder symptoms in young people followed into adulthood suggest that symptoms of autism spectrum disorders can arise at other points in life besides early childhood.

**761 Disrupted Dorsal Mid-Insula Activation During Interoception Across Psychiatric Disorders**

*Camilla L. Nord, Ph.D., et al.* EDITORIAL

Research on interoception, the processing of sensations coming from inside the body, has focused on the insular cortex and its role in integrating body states, emotion, and awareness. The difference between what the brain expects the body signals to be and what the actual body signal afferents are ("interoceptive prediction error") is increasingly recognized as an essential factor contributing to a range of mental disorders.

**771 Neonatal Brain Response to Deviant Auditory Stimuli and Relation to Maternal Trait Anxiety**

*Chad M. Sylvester, M.D., Ph.D., et al.*

This fMRI study measured newborn brain response to unexpected sounds and related this brain response to maternal trait anxiety, a risk factor for anxiety in offspring. Results revealed that the newborn brain has a strong response to unexpected sounds, and in many brain regions higher activity is linked to higher maternal trait anxiety. This study indicates that for some people, the developmental neurobiology of anxiety may begin at birth and include increased brain responsiveness to unexpected stimuli.

**Cover:** In an issue showing the promise of neuroimaging, Sylvester et al. (p. 771) use functional MRI in sleeping neonates to examine the neural systems associated with infant response to the presentation of unexpected auditory stimuli. The paradigm probes the early and fundamental automatic responses to novelty, which later in life are highly relevant to the assessment of, response to, and ability to cope with potential threat. Their work may represent the earliest brain manifestations of anxiety risk.

# Go Online

Visit [ajp.psychiatryonline.org](http://ajp.psychiatryonline.org) for these features!

## **AJP in Advance** *Discover the latest research advances before they appear in print*

### **Anticholinergic Medication Burden—Associated Cognitive Impairment in Schizophrenia**

This cross-sectional study of 1,120 schizophrenia outpatients found that routinely used psychotropic medication regimens are associated with high anticholinergic medication burden and confer impairments across all cognitive domains, even when controlling for demographic and clinical factors. Anticholinergic burden from psychotropics may contribute to cognitive impairment in schizophrenia and ought to be accounted for in routine treatment.

### **Efficacy of Combining Varenicline and Naltrexone for Smoking Cessation and Drinking Reduction: A Randomized Clinical Trial**

A randomized controlled trial examined efficacy of medication in people with excessive use of both cigarettes and alcohol, comparing outcomes in 165 people randomized to either combined varenicline naltrexone treatment or combined varenicline placebo treatment. Results suggest that varenicline alone may sufficiently treat excessive smoking whereas combined varenicline and naltrexone treatment may provide added benefit for excessive alcohol use over varenicline alone.

## **AJP CME** *Earn CME credit: 3 courses per issue*

You can earn CME credits by reading articles in *The American Journal of Psychiatry*. Three articles in this issue form a short course that consists of reading the article and answering three multiple-choice questions with a single correct answer for up to 1 *AMA PRA Category 1 Credit™* each. Credit is issued only to subscribers of the online AJP CME Course Program.

See the table below for the articles in this month's issue that are the subject of a CME quiz.

#### **In this issue**

Evaluating the Machine Learning Literature: A Primer and User's Guide for Psychiatrists (p. 715)

A Longitudinal Study of Resting-State Connectivity and Response to Psychostimulant Treatment in ADHD (p. 744)

Variable Emergence of Autism Spectrum Disorder Symptoms From Childhood to Early Adulthood (p. 752)

## **History of Psychiatry** *Revisit the field's rich history through the AJP Archive*

### **50 years ago this month: Marijuana and Health**

NIMH Director Bertram Brown, M.D., introduces the centerpiece of a special section on the health consequences of marijuana, a summary of the first report to Congress on the issue by the Secretary of Health, Education, and Welfare.

@APAPubJournals  
Psychiatry Online

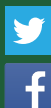

AMERICAN  
PSYCHIATRIC  
ASSOCIATION  
PUBLISHING

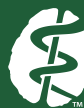

[www.appi.org](http://www.appi.org)  
1-800-368-5777  
[appi@psych.org](mailto:appi@psych.org)
